# Supplementary material
Source: PubMed Central journal article supplement (PMC3993026)
Supplement: Supp_Fig1.pdf [file Supp_Fig1.pdf]

## Supplementary Data

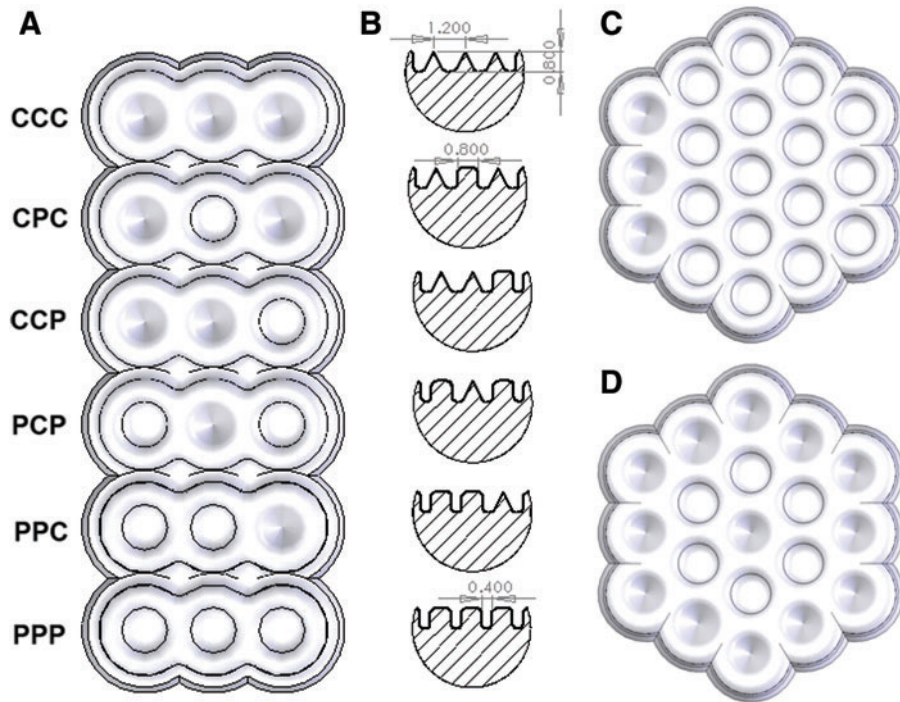

**SUPPLEMENTARY FIG. S1.** Computer aided design drawings of mold designs. Designs with a series of post (P) and cone (C) obstacles. Mold has six individual recesses, each with a unique configuration of three posts/cones placed in a single row arrangement (A). Cross-sectional view of designs (B). Maximum height of obstacles is  $800\ \mu\text{m}$  and the width of the trough surrounding the obstacles is  $400\ \mu\text{m}$ . Left to right order of obstacles in each design. Honeycomb designs with 19 obstacles (mix of cones and posts) arranged in two orbitals around a single obstacle in the center. One design has three cones in a row along one outer edge of the honeycomb (C). The other design has a single cone in the center and 12 cones around the outer edge of the honeycomb (D).
